# Supplementary material for: Usp5 functions as an oncogene for stimulating tumorigenesis in hepatocellular carcinoma
Source: PubMed Central journal article supplement (PMC5584183; doi:10.18632/oncotarget.16901), 2017-04-06
Supplement: oncotarget-08-50655-s001.pdf [file oncotarget-08-50655-s001.pdf]

# Usp5 functions as an oncogene for stimulating tumorigenesis in hepatocellular carcinoma

## Supplementary Materials

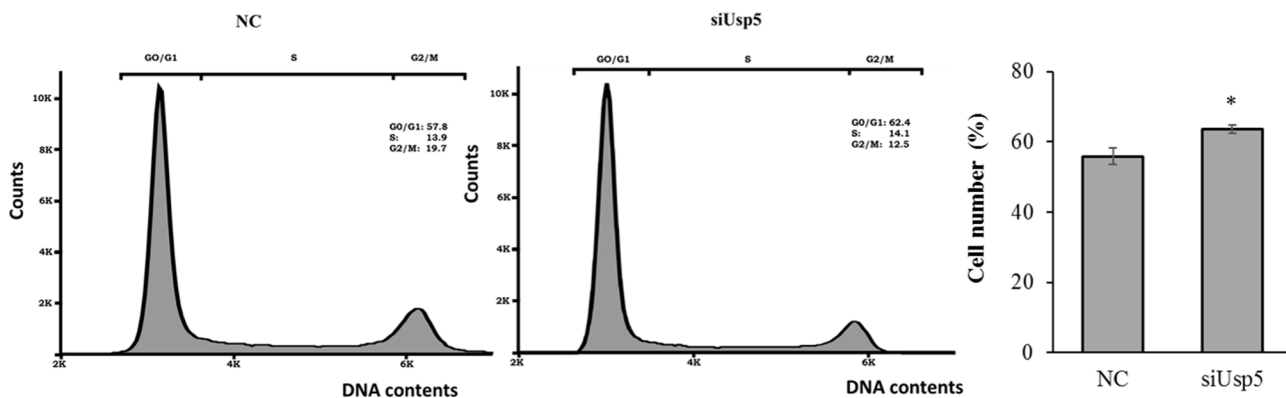

Supplementary Figure 1: The effect of siUsp5 on cell cycle in Be17404 cells. \* $P < 0.05$ .
